# Supplementary material for: Multi-Omics Integration Reveals Only Minor Long-Term Molecular and Functional Sequelae in Immune Cells of Individuals Recovered From COVID-19
Source: PubMed Central journal article supplement (PMC9022455; doi:10.3389/fimmu.2022.838132), 2022-04-06
Supplement: DataSheet_1.pdf [file DataSheet_1.pdf]

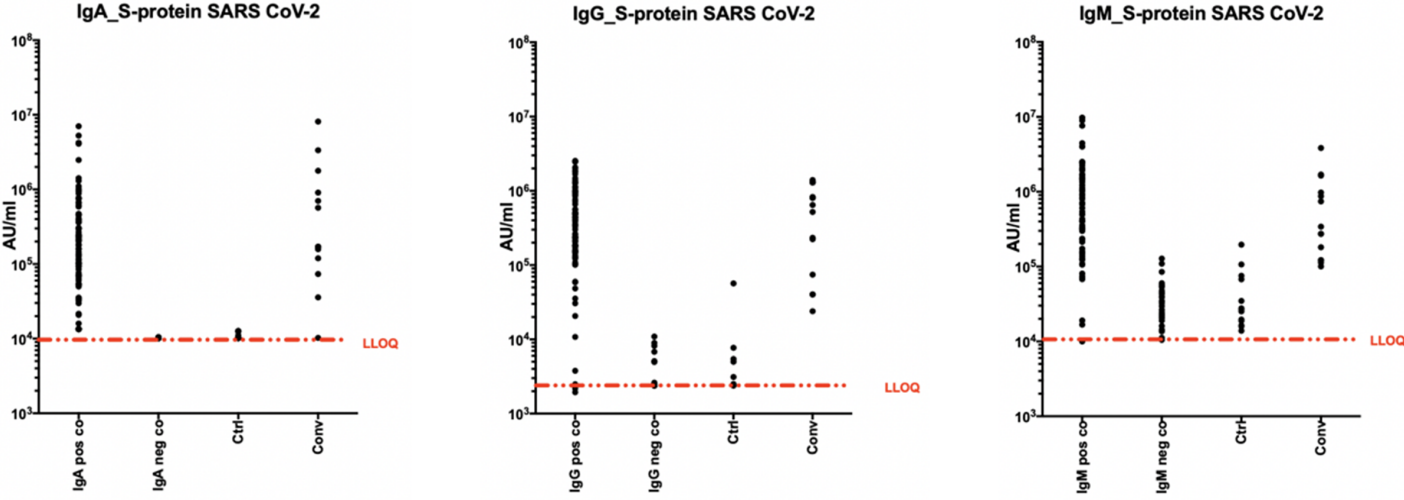

Fig. S1. IgA, IgG, and IgM antibodies against spike protein in the study participants.

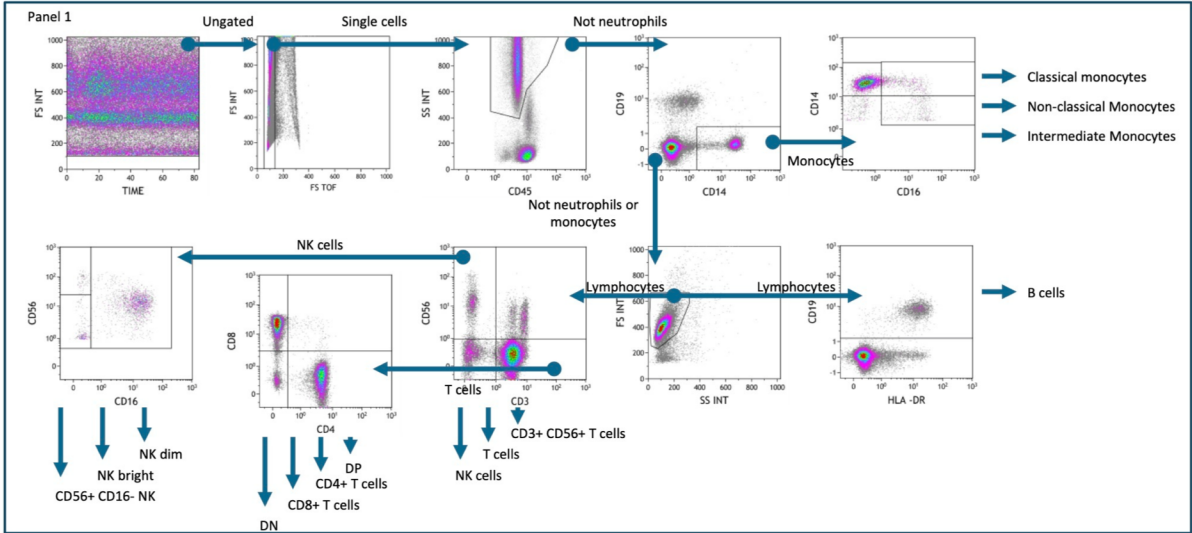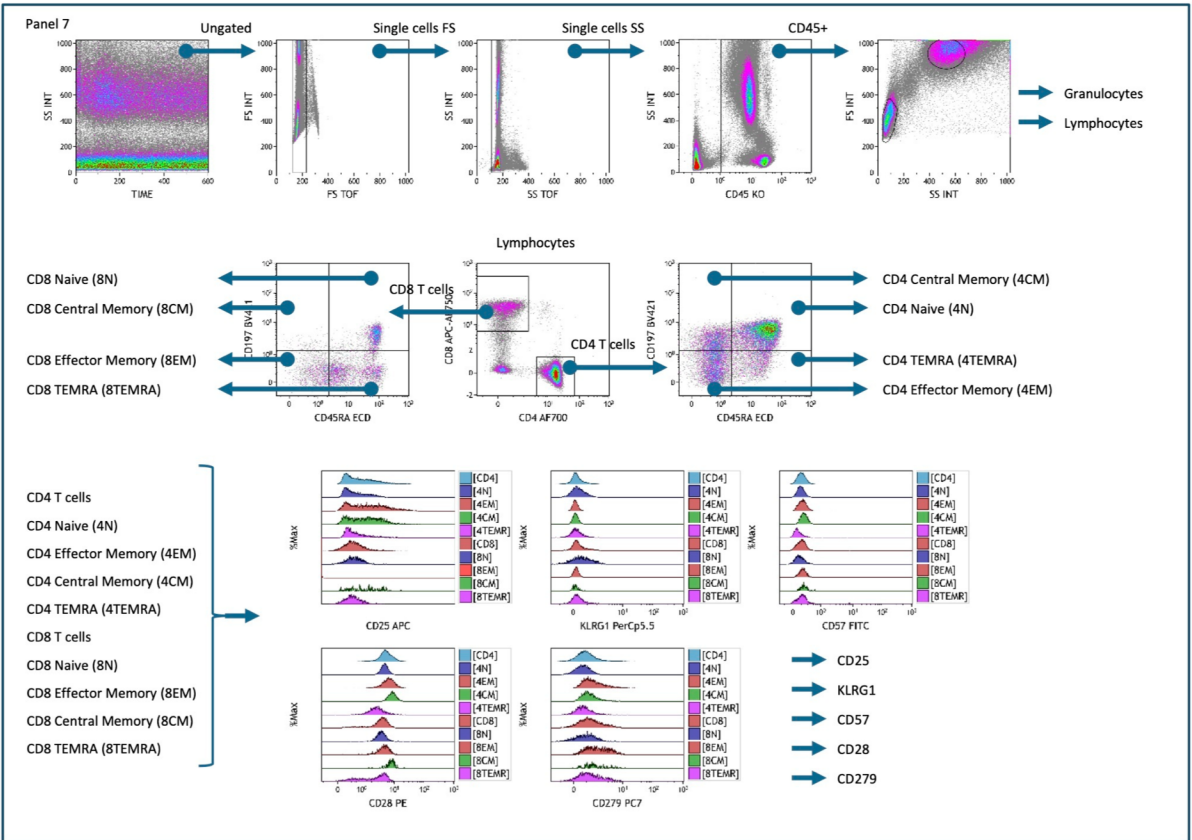

**Fig. S2. Gating strategy used in flow cytometry analyses.**

(A)

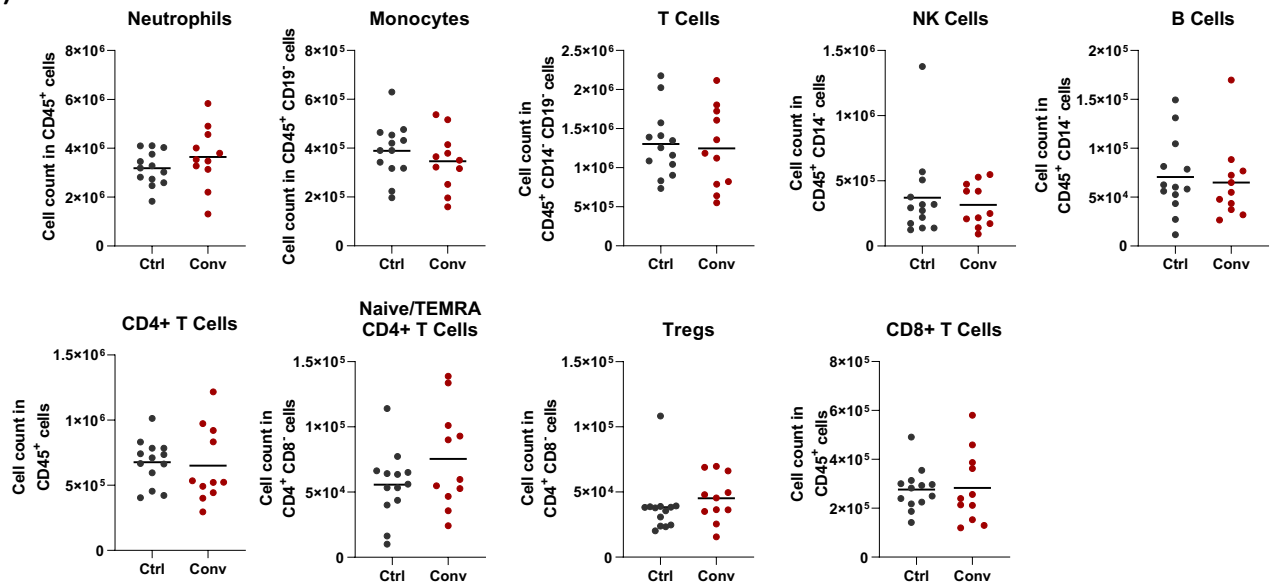

(B)

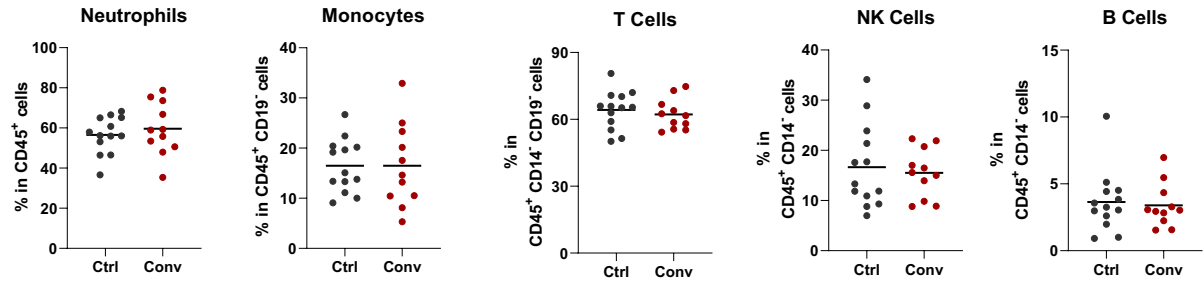

(C)

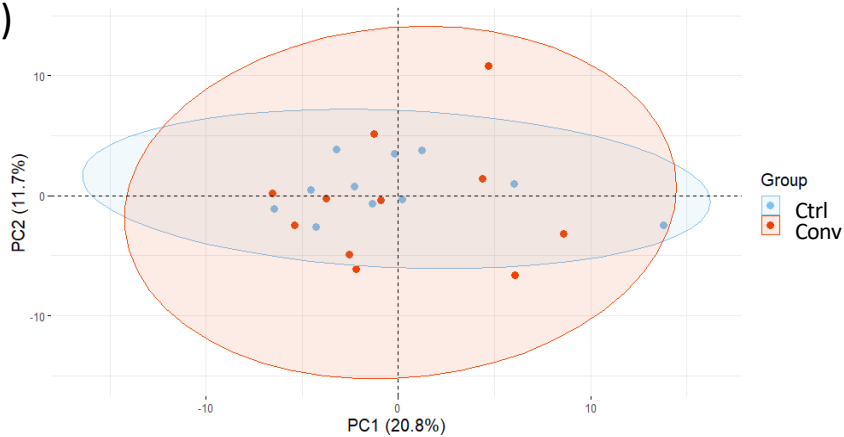

**Fig. S3. Flow cytometry analysis of cell populations in the blood.** (A) Dot plots showing the absolute cell counts of immune cell populations in the blood. (B) Dot plots showing the percentages of the main cell populations in the blood of healthy controls and convalescent COVID-19 patients. (C) Principal component analysis of the cell populations based on the absolute cell counts.

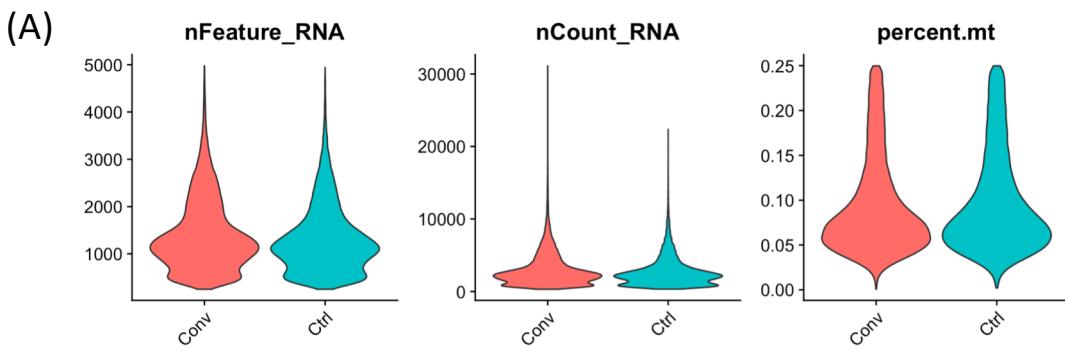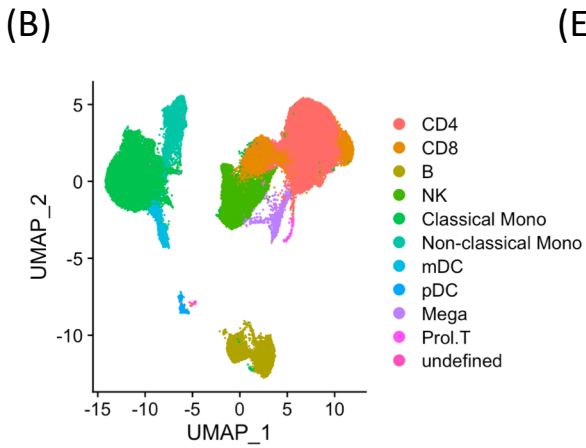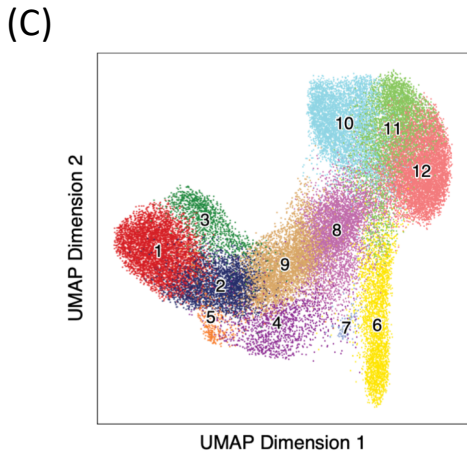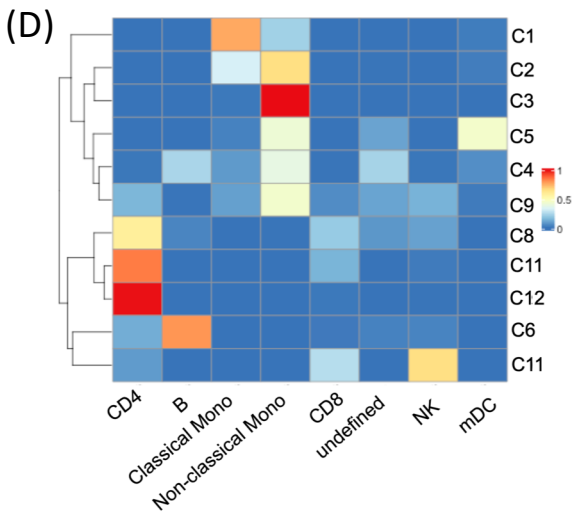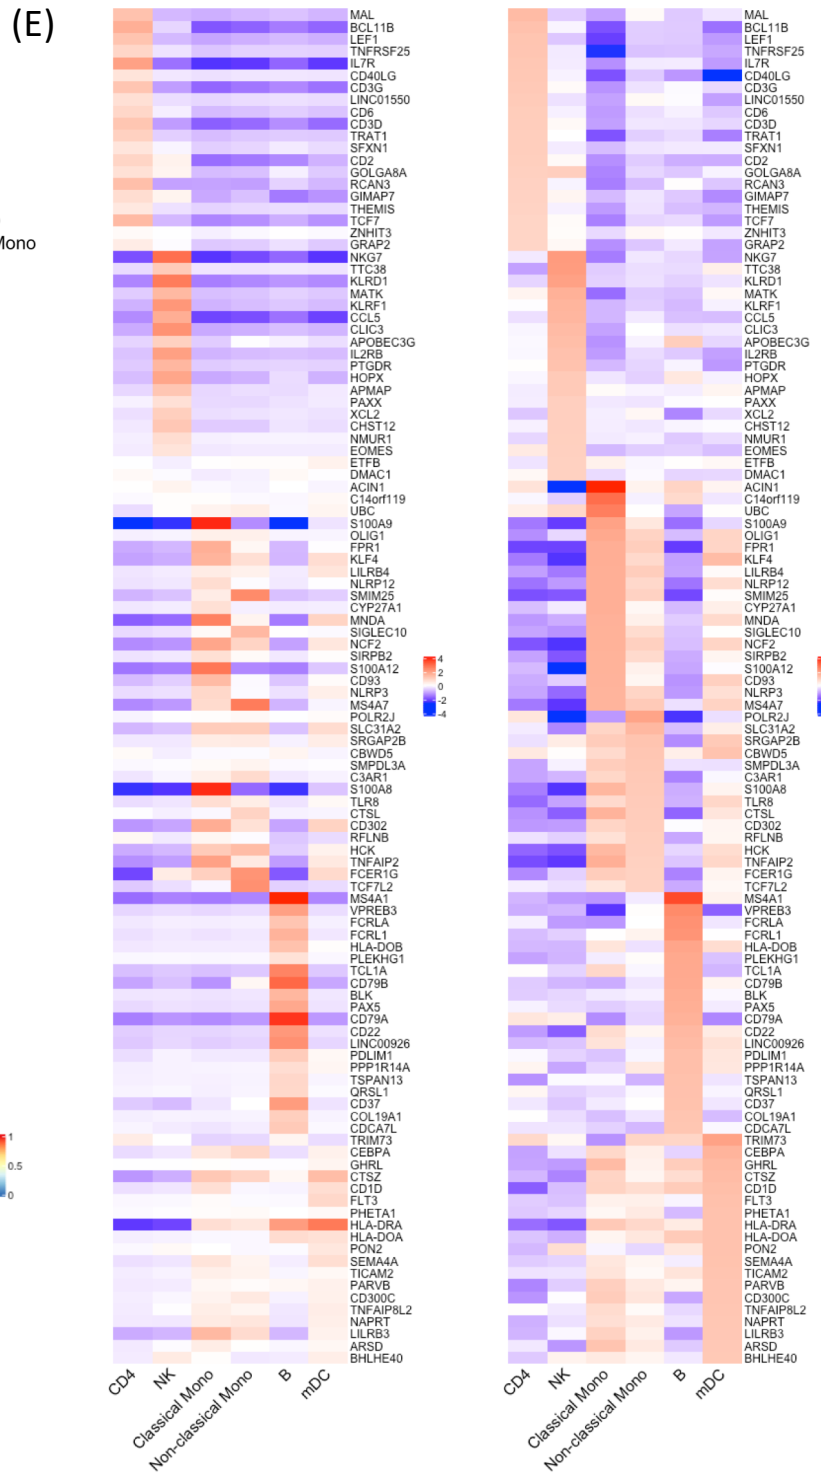

**Fig. S4. Single-cell RNA-seq and ATAC-seq analysis of PBMCs in convalescent COVID-19 individuals.** (A) Number of RNA features, counts, and mitochondria percentage after QC for the scRNA-seq dataset. (B) UMAP visualization of scRNA-seq profiling in both convalescent COVID-19 patients and controls. 11 cell clusters were annotated, each color indicated one cell type. (C) UMAP visualization of scATAC-seq profiling in both convalescence COVID-19 and controls. 12 cell clusters were identified. (D) Heatmap showing the integration results of scATAC-seq and scRNA-seq data. Color indicates the level of overlapping between two clusters from scATAC-seq and scRNA-seq. C1-C12 were corresponding to the cell clusters labelled in (C). (E) Heatmap showing the expression level of the top overlapping markers in scATAC-seq (left) and scRNA-seq (right).

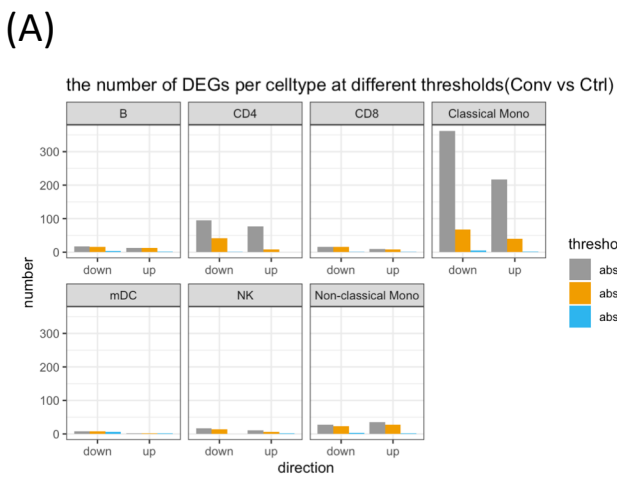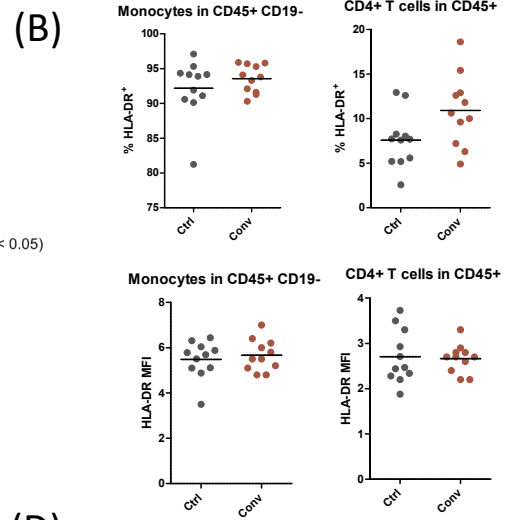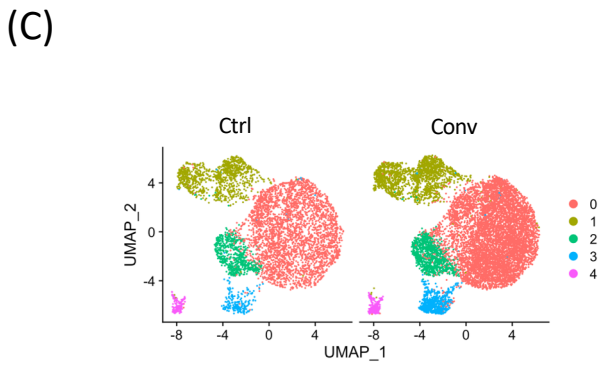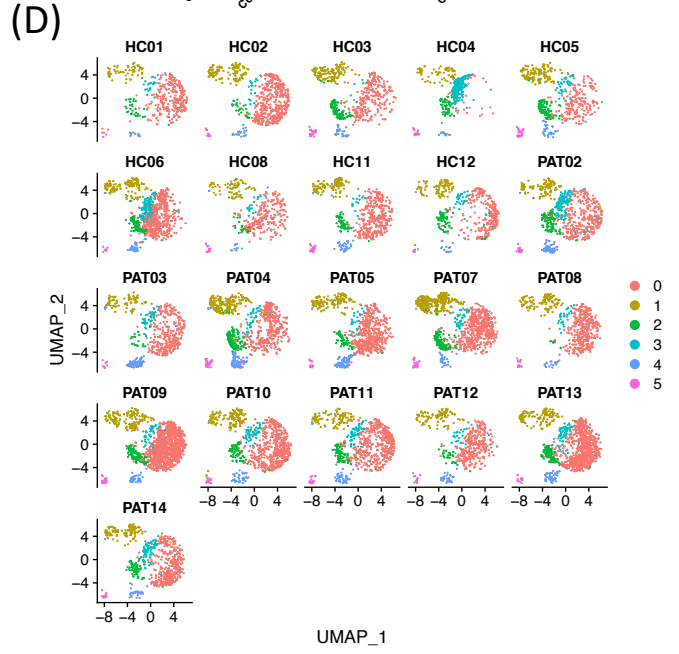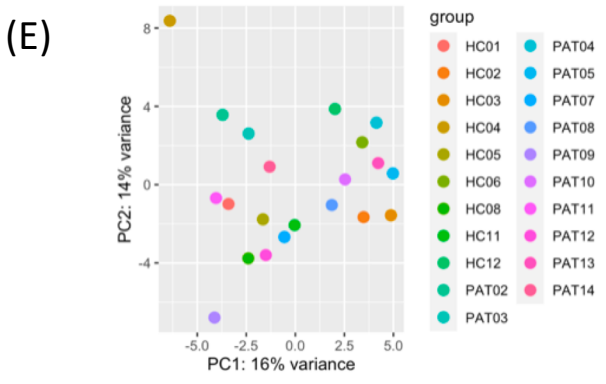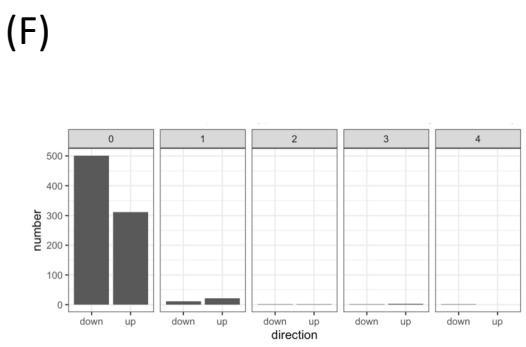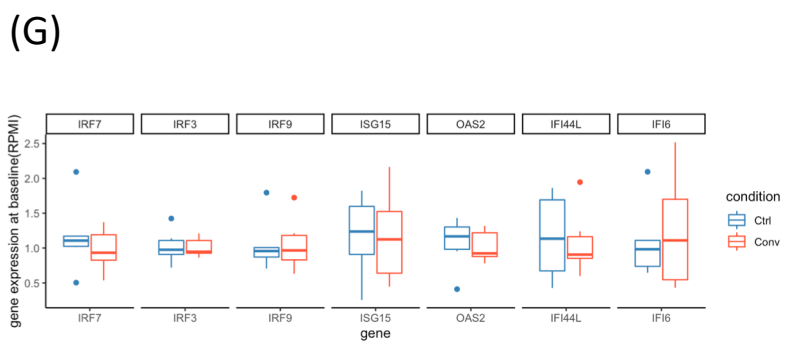

**Fig. S5. Transcriptional changes from single-cell RNA and ISG expression at baseline level.** (A) The number of down- or up-regulated DEGs found in each cell type. The color for each bar depicts different thresholds of the log fold change. (B) Surface expression of HLA-DR in monocytes and CD4<sup>+</sup> T cells, analyzed by flow cytometry. Both HLA-DR<sup>+</sup> cells and the mean fluorescent intensity (MFI) of HLA-DR were shown. (C) UMAPs showing the sub-clusters in classical monocytes. (D) UMAPs showing the sub-clusters in classical monocytes split by samples. (E) PCA on classical monocytes specific-pseudo-bulk RNA result. (F) The number of DEGs between convalescence COVID-19 and controls were identified in each cluster. (G) Baseline ISG expressions level between controls and convalescent individuals.

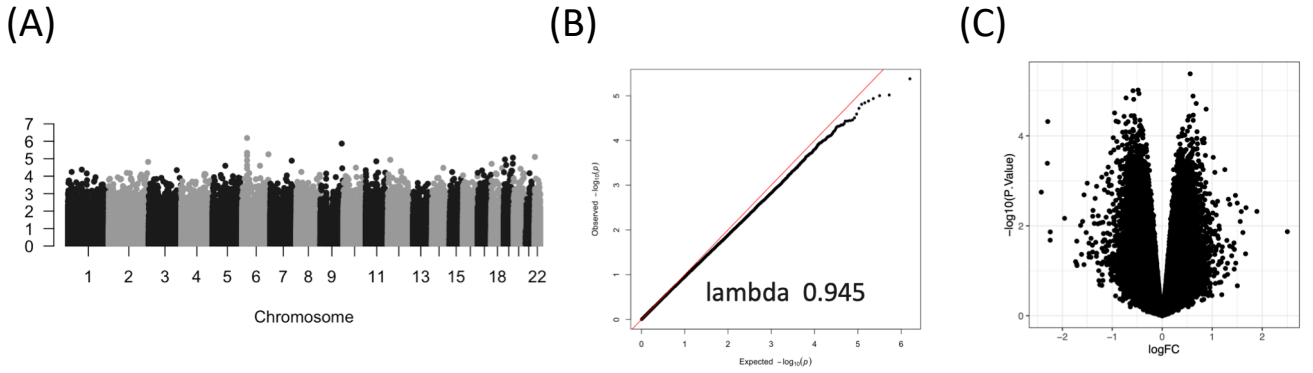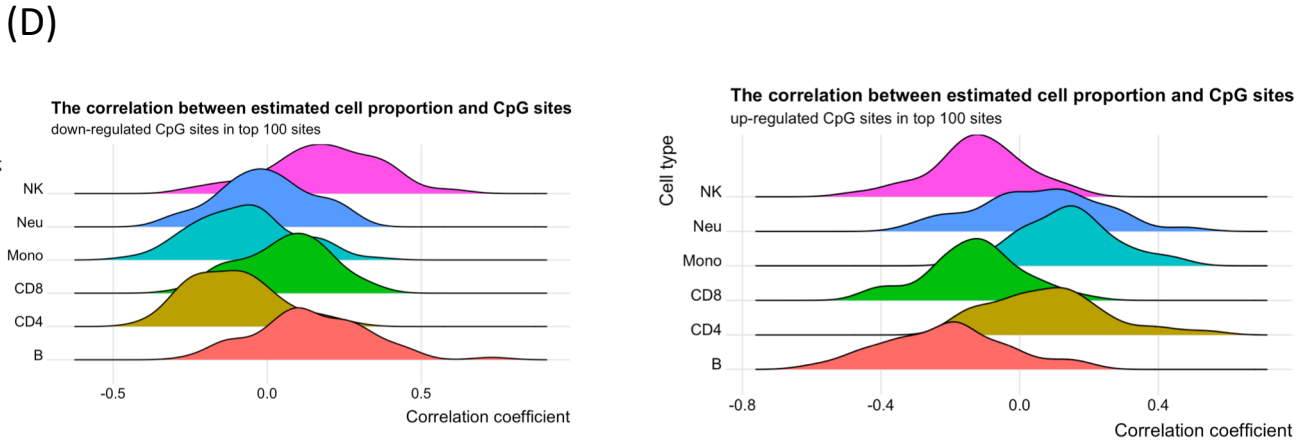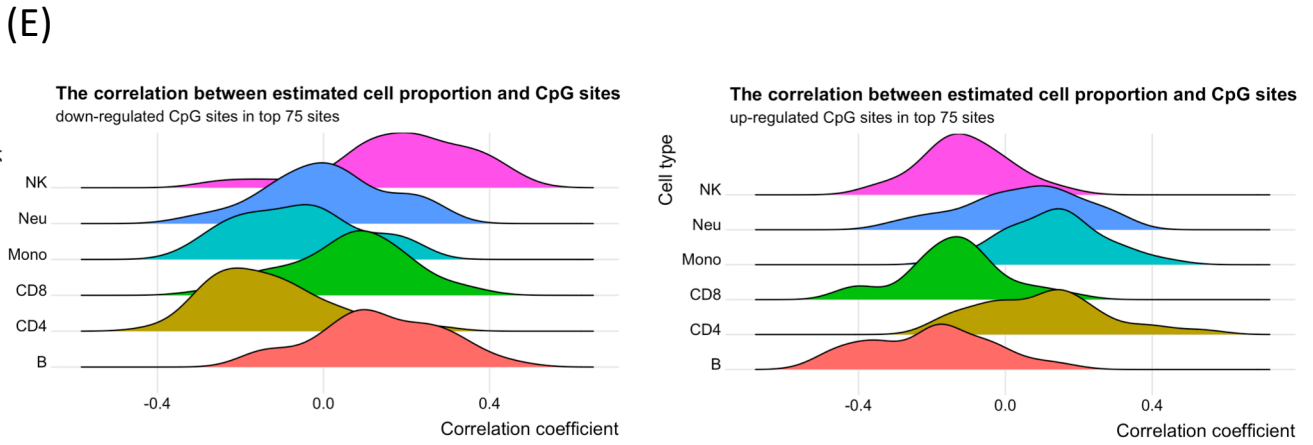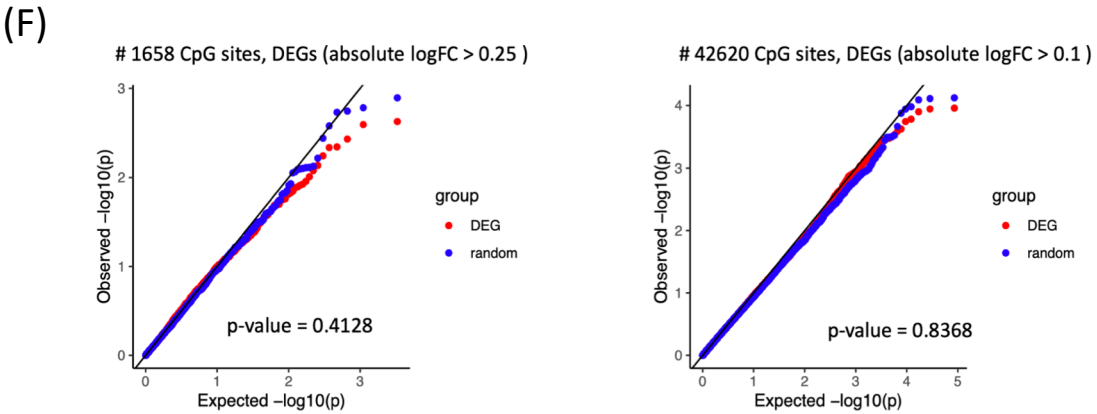



**Fig. S6. Epigenome-wide association analysis of convalescent COVID-19 and healthy controls.** (A) The Manhattan plot showing the epigenome-wide association analysis (EWAS) results comparing DNA methylation profiles between convalescent COVID-19 individuals and controls. The x-axis is the chromosomal position, and the y axis is the significance on a  $-\log_{10}$  scales. No significant CpG sites were identified with  $FDR < 0.05$ . (B) The quantile-quantile (Q-Q) plot showing the distribution of the  $-\log_{10}(P \text{ value})$  from the EWAS result and the expected  $-\log_{10}(P \text{ value})$ . The lambda value is 0.945. (C) The volcano plot showing the log fold change and the  $-\log_{10}(P \text{ value})$  for each CpG site. (D) The density ridgeline plots showing the correction between the estimated cell proportions and the down-regulated(left) or up-regulated(right) CpG sites in the top 100 differentially methylated CpG sites. (E) The density ridgeline plots showing the correction between the estimated cell proportions and the down-regulated(left) or up-regulated(right) CpG sites in the top 75 differentially methylated CpG sites. (F) The quantile-quantile (Q-Q) plot showing the distribution of the  $-\log_{10}(P \text{ value})$  and the expected  $-\log_{10}(P \text{ value})$  for the CpG sites in the proximity ( $\pm 250\text{kb}$ ) of the DEGs from monocytes and those random choose from our EWAS result. Red dot represented the CpG sites around DEGs, Blue dot represented the random chosen CpG sites. Two-sample Kolmogorov-Smirnov test was used to compare the distributions of the p values from two groups.

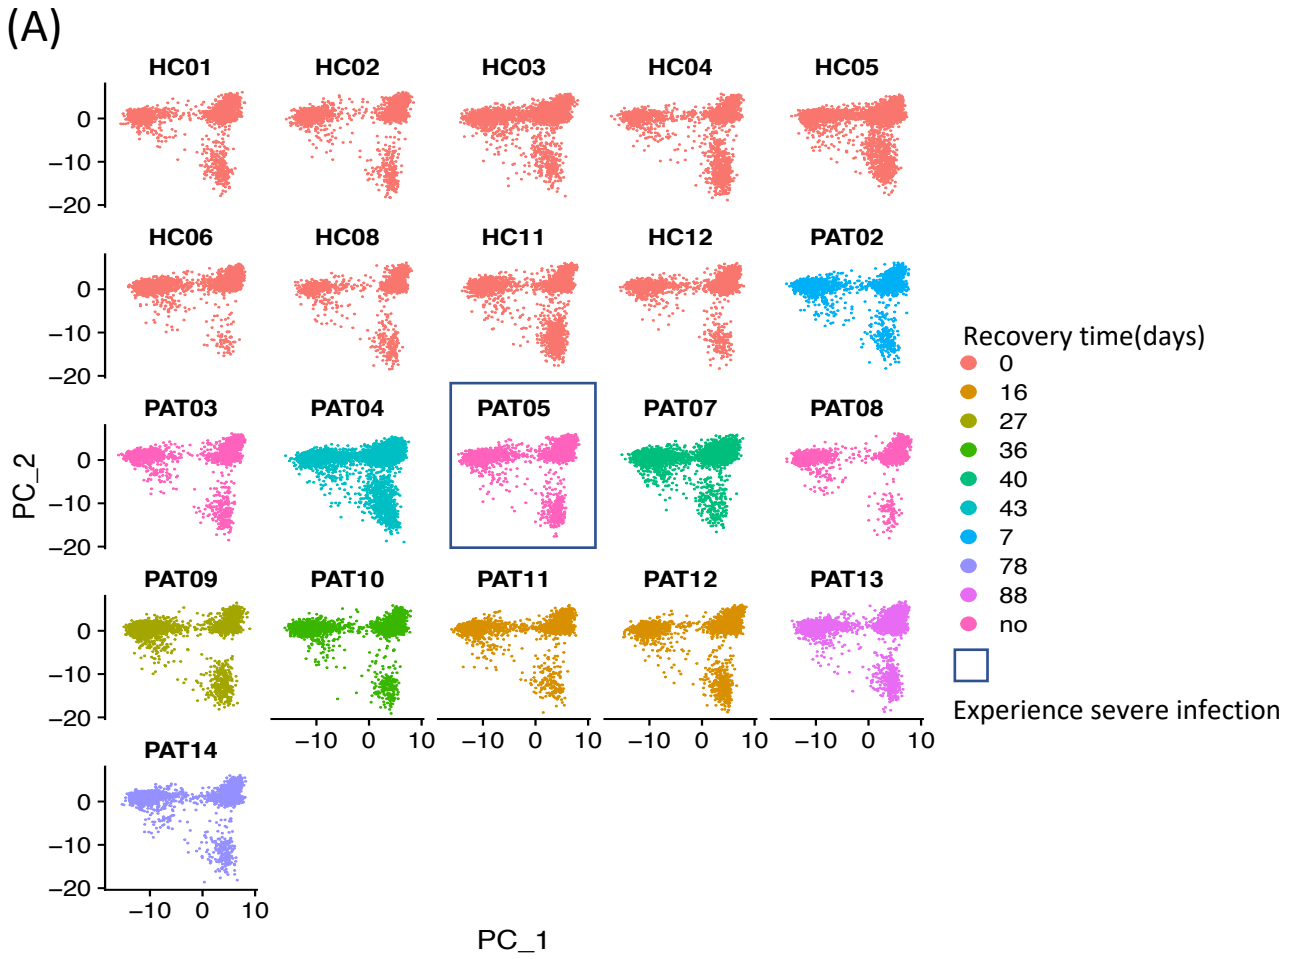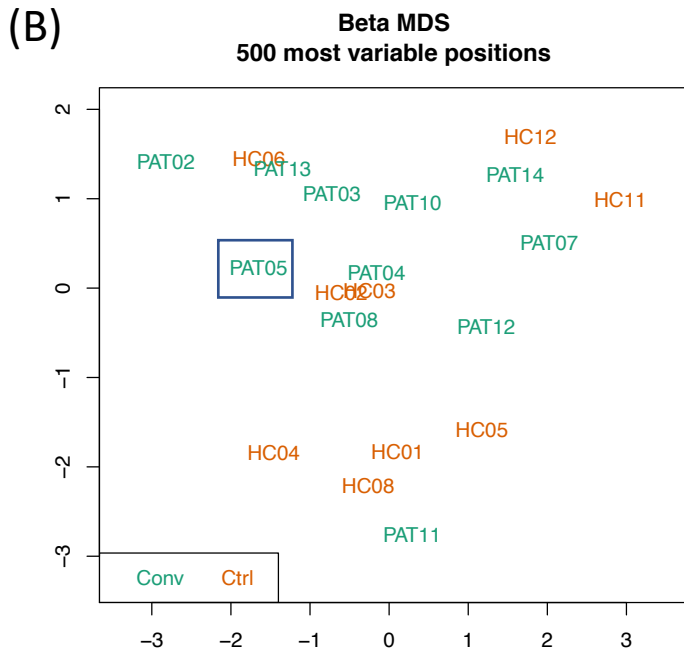

**Fig. S7. Dimensional reduction plot in single-cell RNA and methylation data.** (A) PCA plot in each individual. Recovery time was defined as the disappearance of symptoms to sample collection. “0” represents the healthy control group. “no” in the legend indicates the missing value in our clinical information. (B) Multi-dimensional scaling (MDS) plots showing a 2-d projection of distances between participants from methylation data.

**Table S1. Flow cytometry antibodies used for the analysis of immune cells**

| REAGENT or RESOURCE                         | SOURCE           | IDENTIFIER                        |
|---------------------------------------------|------------------|-----------------------------------|
| <b>Granulocyte panel</b>                    |                  |                                   |
| anti-CD16 FITC (clone 3G8)                  | Beckman Coulter  | Cat#B49215; RRID: AB_2848116      |
| anti-CD10 PE (HI10A)                        | BioLegend        | Cat#312203; RRID: AB_314914       |
| anti-CD11b PE-Dazzle (ICRF44)               | BioLegend        | Cat#301347; RRID: AB_2564080      |
| anti-CD14 PE-Cy5.5 (clone M5E2)             | BioLegend        | Cat#301847; RRID: AB_2564058      |
| anti-CD62L PE-Cy7 (clone DREG-56)           | BioLegend        | Cat#304821; RRID: AB_830800       |
| anti-PD-L1 APC (clone MIH1)                 | ThermoFisher     | Cat#17598342; RRID: AB_10597586   |
| anti-CD66b AF700 (G10F5)                    | BioLegend        | Cat#305113; RRID: AB_2566037      |
| anti-CD15 Brilliant Violet 421 (clone W6D3) | BioLegend        | Cat#323039; RRID: AB_2566519      |
| anti-CD45 Krome Orange (clone J33)          | Beckman Coulter  | Cat#A96416; RRID: AB_2833027      |
| <b>General panel</b>                        |                  |                                   |
| anti-CD16 FITC (clone 3G8)                  | Beckman Coulter  | Cat#B49215; RRID: AB_2848116      |
| anti-HLA-DR PE (clone immu-357)             | Beckman Coulter  | Cat#IM1639; RRID: AB_131284       |
| anti-CD14 ECD (clone RM052)                 | Beckman Coulter  | Cat#B92391; RRID: AB_130853       |
| anti-CD4 PE-Cy5.5 (clone 13B8.2)            | Beckman Coulter  | Cat#B16491; RRID: Unknown         |
| anti-CD25 PE-Cy7 (clone M-A251)             | BD Biosciences   | Cat#557741; RRID: AB_396847       |
| anti-CD56 APC (clone N901)                  | Beckman Coulter  | Cat#IM2474; RRID: AB_130791       |
| anti-CD8 APC-AF700 (clone B9.11)            | Beckman Coulter  | Cat#B49181; RRID: AB_2750854      |
| anti-CD19 APC-AF750 (clone J3-119)          | Beckman Coulter  | Cat#A94681; RRID: AB_2833030      |
| anti-CD3 Pacific Blue (clone UCHT1)         | Beckman Coulter  | Cat#A93687; RRID: AB_2728095      |
| anti-CD45 Krome Orange (clone J33)          | Beckman Coulter  | Cat#A96416; RRID: AB_2833027      |
| <b>B cell panel</b>                         |                  |                                   |
| anti-IgD FITC (clone IADB6)                 | Southern Biotech | Cat#2032-02; RRID: AB_2687521     |
| anti-IgM PE (clone SA-DA4)                  | Beckman Coulter  | Cat#B30657; RRID: unknown         |
| anti-CD3 ECD (clone UCHT1)                  | Beckman Coulter  | Cat#A07748; RRID: unknown         |
| anti-CD27 PE-Cy5.5 (clone 1A4CD27)          | Beckman Coulter  | Cat#B21444; RRID: unknown         |
| anti-CD38 PE-Cy7 (clone LS198-4-3)          | Beckman Coulter  | Cat#B49198; RRID: unknown         |
| anti-CD24 APC (clone ALB9)                  | Beckman Coulter  | Cat#A87785; RRID: unknown         |
| anti-CD5 APC-AF700 (clone BL1a)             | Beckman Coulter  | Cat#A78835; RRID: unknown         |
| anti-CD19 APC-AF750 (clone J3-119)          | Beckman Coulter  | Cat#A94681; RRID: AB_2833030      |
| anti-CD20 Pacific Blue (clone B9E9)         | Beckman Coulter  | Cat#B49208; RRID: unknown         |
| anti-CD45 Krome Orange (clone J33)          | Beckman Coulter  | Cat#A96416; RRID: AB_2833027      |
| <b>Senescence panel</b>                     |                  |                                   |
| anti-CD57 FITC (clone NC1)                  | Beckman Coulter  | Cat#IM0466U; RRID: unknown        |
| Anti-CD28 PE (clone CD28.1)                 | DAKO             | Cat#R7164; RRID: AB_579570        |
| Anti-CD45RA ECD (clone 2H4LDH11LDB9)        | Beckman Coulter  | Cat#B49193; RRID: unknown         |
| Anti-KLRG1 PerCp-Cy5.5 (clone 2F1)          | Biolegend        | Cat#138418; RRID: AB_2563014      |
| Anti-CD279 PE-Cy7 (clone EH12.2H7)          | Biolegend        | Cat#329918; RRID: AB_2159324      |
| Anti-CD25 APC (clone 2A3)                   | BD Biosciences   | Cat#340907; RRID: AB_2819021      |
| Anti-CD4 AF700 (clone RPA-T4)               | eBioscience      | Cat#56-0049-42; RRID: AB_11219085 |
| anti-CD8 APC-AF750 (clone B9.11)            | Beckman Coulter  | Cat#A94683; RRID: unknown         |
| Anti-CD197 BV421 (clone G043H7)             | Biolegend        | Cat#353208; RRID: AB_11203894     |
| anti-CD45 Krome Orange (clone J33)          | Beckman Coulter  | Cat#A96416; RRID: AB_2833027      |

**Table S2. Human primers used for RT-qPCR**

---

| <b>Gene</b> | <b>Primer</b> | <b>Sequence</b>         |
|-------------|---------------|-------------------------|
| HPRT1       | Forward       | CCTGGCGTCGTGATTAGTGAT   |
|             | Reverse       | AGACGTTCAATCCTGTCCATAA  |
| IFI44L      | Forward       | AGGGAATCATTGGCTCTGTAGA  |
|             | Reverse       | AGCCGTCAGGGATGTACTATAAC |
| IFI6        | Forward       | GGTCTGCGATCCTGAATGGG    |
|             | Reverse       | TCACTATCGAGATACTTGTGGGT |
| IRF3        | Forward       | AGAGGCTCGTGATGGTCAAG    |
|             | Reverse       | AGGTCCACAGTATTCTCCAGG   |
| IRF7        | Forward       | GCTGGACGTGACCATCATGTA   |
|             | Reverse       | GGGCCGTATAGGAACGTGC     |
| IRF9        | Forward       | GATACAGCTAAGACCATGTTCCG |
|             | Reverse       | TGATACACCTTGTAGGGCTCA   |
| ISG15       | Forward       | CGCAGATCACCCAGAAGATCG   |
|             | Reverse       | TTCGTGCGATTTGTCCACCA    |
| OAS2        | Forward       | CTCAGAAGCTGGGTTGGTTTAT  |
|             | Reverse       | ACCATCTCGTCGATCAGTGTC   |

---

**Table S3. Conditions of the RT-qPCR reaction**

| Step                 | Temperature | Duration   | Cycle # |
|----------------------|-------------|------------|---------|
| Initial Denaturation | 95°C        | 10 minutes | 1       |
| Denaturation         | 95°C        | 15 seconds | 40      |
| Annealing/Extension  | 60°C        | 60 seconds |         |
| Hold                 | 4°C         | ∞          |         |

**Table S4. Significant differential methylation regions between convalescent individuals and controls.**

| <b>chr</b> | <b>start</b> | <b>end</b> | <b>p</b>    | <b>fdr</b>  | <b>sidak</b> | <b>nprobe</b> |
|------------|--------------|------------|-------------|-------------|--------------|---------------|
| 4          | 184908582    | 184909019  | 3,44855E-12 | 1,03457E-10 | 6,26732E-09  | 7             |
| 6          | 32063726     | 32064498   | 1,83542E-10 | 2,75312E-09 | 1,88817E-07  | 19            |
| 7          | 51539131     | 51539584   | 2,4409E-09  | 2,4409E-08  | 4,27933E-06  | 5             |
| 6          | 26195697     | 26195996   | 8,23619E-09 | 6,17714E-08 | 2,18763E-05  | 4             |
| 10         | 18689430     | 18689949   | 2,70612E-08 | 1,6208E-07  | 4,1409E-05   | 8             |
| 20         | 26190328     | 26190355   | 3,24159E-08 | 1,6208E-07  | 0,000953041  | 3             |
| 17         | 1808573      | 1808744    | 4,10798E-08 | 1,76056E-07 | 0,000190772  | 3             |
| 6          | 31275551     | 31275808   | 8,22663E-08 | 3,08498E-07 | 0,000254189  | 8             |
| 8          | 61880392     | 61880471   | 1,05629E-07 | 3,52096E-07 | 0,001061324  | 3             |
| 1          | 77230619     | 77230960   | 1,46924E-07 | 4,15219E-07 | 0,000342128  | 4             |
| 1          | 228291486    | 228291706  | 1,52247E-07 | 4,15219E-07 | 0,000549453  | 4             |
| 16         | 6534204      | 6534431    | 2,02085E-07 | 5,05212E-07 | 0,000706771  | 3             |
| 11         | 133928292    | 133928347  | 5,2837E-07  | 1,21932E-06 | 0,007600526  | 3             |
| 2          | 128453260    | 128453485  | 5,8092E-07  | 1,24483E-06 | 0,002048389  | 4             |
| 17         | 36997449     | 36997741   | 1,05346E-06 | 2,10691E-06 | 0,00286112   | 7             |
| 1          | 2501853      | 2501938    | 1,38444E-06 | 2,59582E-06 | 0,012852065  | 2             |
| 6          | 34482411     | 34482680   | 1,49014E-06 | 2,62966E-06 | 0,004389796  | 6             |
| 6          | 116381904    | 116382180  | 1,79163E-06 | 2,98606E-06 | 0,005142156  | 5             |
| 18         | 3624189      | 3624430    | 2,17096E-06 | 3,42783E-06 | 0,007128637  | 2             |
| 1          | 203044930    | 203045230  | 2,94096E-06 | 4,41144E-06 | 0,007755376  | 3             |
| 14         | 106322760    | 106322987  | 3,56075E-06 | 5,08678E-06 | 0,01238048   | 3             |
| 3          | 9289747      | 9289894    | 3,90732E-06 | 5,32816E-06 | 0,020888631  | 3             |
| 11         | 3190573      | 3190639    | 4,98267E-06 | 6,49913E-06 | 0,058195365  | 2             |
| 12         | 67197851     | 67197985   | 5,66787E-06 | 7,08484E-06 | 0,033034402  | 3             |
| 15         | 66947564     | 66947618   | 3,94539E-05 | 4,73447E-05 | 0,440251472  | 3             |
| 12         | 132293388    | 132293657  | 4,15007E-05 | 4,78854E-05 | 0,11531907   | 3             |
| 16         | 67997858     | 67997922   | 0,000584899 | 0,000649888 | 0,999297071  | 2             |
| 10         | 375391       | 375392     | 0,002219619 | 0,002378163 | 1            | 1             |
| 5          | 38445612     | 38445835   | 0,002607366 | 0,002697275 | 0,999908389  | 4             |
| 19         | 55973102     | 55973112   | 0,003353333 | 0,003353333 | 1            | 2             |
